# Supplementary material for: Proinsulin-Specific, HLA-DQ8, and HLA-DQ8-Transdimer–Restricted CD4+ T Cells Infiltrate Islets in Type 1 Diabetes
Source: Oxford University Press journal article supplement (doi:10.2337/db14-0858), 2014-08-25
Supplement: db140858supplementarydata2.xls [file db140858supplementarydata2.xls]

## Sheet: CD4 Alpha
Clone	TRAV	TRAJ	TRA CDR3	P	N	TRA CDR3 DNA	TRA CDR3 length (AA)	CDR3 pI		Clone	TRBV beta	TRBJ	TRBD	TRB CDR3	P	N1	N2	TRB CDR3	CDR3 length (AAs)	pI
A1.1	TRAV25*01	TRAJ16*01	CAGGFSDGQKLLF		g	tgtgcaggggggttttcagatggccagaagctgctcttt	11			A1.1	TRBV20-1*03/*04/*05/*06/*07	TRBJ2-7*01	TRBD1*01	CSARTEAYEQYF		ga	agg	tgcagtgcgaggacagaggcctacgagcagtacttc	10	4.4
A1.2	TRAV20*01/*02/*03/*04	TRAJ58*01	CAVIETSGSRLTF		catc	tgtgctgtcatcgaaaccagtggctctaggttgaccttt	11	6.45		A1.2	TRBV20-1*03/*04/*05/*06/*07	TRBJ2-3*01	TRBD2*01	CSARDQQRVDTQYF	tc	aac	tg	tgcagtgctagagatcaacagcgggtggatacgcagtatttt	12	6.59
A1.3	TRAV19*01	TRAJ21*01	CALSEQETFNKFYF		caagaaac	tgtgctctgagtgagcaagaaaccttcaacaaattttacttt	12	4.4		A1.3	TRBV12-3*01	TRBJ1-5*01	TRBD1*01	CASSLAWGADQPQHF		ctg	gg	tgtgccagcagtttagcctggggggcggatcagccccagcatttt	13	5.45
A1.4	TRAV13-1*01	TRAJ39*01	CAAPHNAGNMLTF		CCCC	tgtgcagcaccccataatgcaggcaacatgctcaccttt	11	7.5		A1.4	TRBV2*01/*02	TRBJ1-5*01	TRBD1*01	CASRNRDGELPQHF		gaacc	ggagagct	tgtgccagcaggaaccgggacggagagctgccccagcatttt	12	7.5
A1.5	TRAV8-2*01/*02	TRAJ5*01	CVVSDLDTGRRALTF		cc	tgtgttgtgagtgacctggacacgggcaggagagcacttactttt	13	6.6		A1.5	TRBV7-2*01/*04	TRBJ1-2*01	TRBD2*01	CASSSTYGYTF			ct	tgtgccagcagctctacttatggctacaccttc	9	13
A1.7	TRAV35*02	TRAJ28*01	CAGQEPGAGSYQLTF		gaac	tgtgctgggcaggaacctggggctgggagttaccaactcactttc	13	13		A1.7	TRBV5-1*01/*02	TRBJ1-3*01	TRBD1*01	CASSSRIGNTIYF		ccc	t	tgcgccagcagctcccggattggaaacaccatatatttt	11	9.25
A1.8	TRAV13-2*01	TRAJ11*01	CAENIGYSTLTF	t		tgtgcagagaatataggatacagcaccctcaccttt	10	13		A1.8	TRBV10-3*01/*02/*04	TRBJ2-7*01	TRBD1*01	CAISGPNRGSSYEQYF	ag	gcccaa		tgtgccatcagtggcccaaacagggggagctcctacgagcagtacttc	14	6.44
A1.9	TRAV20*02/*04	TRAJ7*01	CAVQAGGNNRLAF	cc	gga	tgtgctgtgcaggccggagggaacaacagactcgctttt	11	10.25		A1.9	TRBV5-1*01	TRBJ1-2*01	TRBD1*01	CASSLERDGYTF		aaa		tgcgccagcagcttggaaagggacggctacaccttc	10
A1.10	TRAV8-3*02	TRAJ10*01	CAVGVTGGGNKLTF		ggg	tgtgctgtgggggtcacgggaggaggaaacaaactcaccttt	12	9.25		A1.10	TRBV5-4*01/*03	TRBJ1-2*01	TRBD1*01	CASSLRDRGNYGYTF		aa		tgtgccagcagcttaagggacaggggtaactatggctacaccttc	13	9.07
A2.1	TRAV20*02/*04	TRAJ7*01	CAVQAGGNNRLAF	cc	gga	tgtgctgtgcaggccggagggaacaacagactcgctttt	11	10.25		A2.1	TRBV5-1*01	TRBJ1-2*01	TRBD1*01	CASSLERDGYTF		aaa		tgcgccagcagcttggaaagggacggctacaccttc	10	4.4
A2.3	TRAV19*01	TRAJ57*01	CALSDSQGGSEKLVF		ttca	tgtgctctgagtgattcacagggcggatctgaaaagctggtcttt	13	4.4		A2.3	TRBV6-5*01	TRBJ2-1*01	TRBD2*01	CASRRTSGFNEQFF		gc	att	tgtgccagcaggcggactagcggattcaatgagcagttcttc	12	10.1
A2.4	TRAV19*01	TRAJ49*01	CALSRAGTGNQFYF		ttgagccgggcagg	tgtgctttgagccgggcaggcaccggtaaccagttctatttt	12	9.25		A2.4	TRBV5-1*01/*02	TRBJ2-4*01	TRBD2*01	CASSLGLRGENIQYF		gctt		tgcgccagcagcttgggcttgcggggggaaaacattcagtacttc	13	6.44
A2.5	TRAV6*03	TRAJ44*01	CALSMFLTSGTASKLTF		agtatgtttcttacgt	tgtgctctaagtatgtttcttacgtccggcactgccagtaaactcaccttt	15	9.25		A2.5	TRBV30*01/*05	TRBJ2-7*01	TRBD2*02	CAWSLRGGTFTYEQYF		ctcag	acgttca	tgtgcctggagtctcaggggagggacgttcacctacgagcagtacttc	14	6.44
A2.7	TRAV36/DV7*04	TRAJ42*01	CAS#GGSQGNLIF			# frame shift mutation in CDR3				A2.7	TRBV6-5*01	TRBJ2-3*01	TRBD1*01	CASSYFSGAGTDTQYF		tttttc	cg	tgtgccagcagttatttttcgggggccggcacagatacgcagtatttt	14	13
A2.7	TRAV13-1*01	TRAJ43*01	CAANPHNDMRF		atcctc	tgtgcagcaaatcctcacaatgacatgcgcttt	9	7.5		2x TRA	-	-	-	-		-	-	-	-	-
A2.8	TRAV1-1*01/*02	TRAJ15*01	CAVRDQ#QAGTALIF			# frame shift mutation in CDR3				A2.8	TRBV7-2*01/*04	TRBJ2-5*01	TRBD1*01	CASSLQGARDGETQYF			gcgggatggg	tgtgccagcagcttacagggggcgcgggatggggagacccagtacttc	14	4.4
A2.8	TRAV2*01/*02	TRAJ6*01	CAVQAGGSYIPTF		tcagg	tgtgctgttcaggcaggaggaagctacatacctacattt	11	13		2x TRA	-	-	-	-		-	-	-	-	-
A2.9	TRAV13-1*01	TRAJ10*01	CAAKVGVTGGGNKLTF		aggttgggg	tgtgcagcaaaggttggggtcacgggaggaggaaacaaactcaccttt	14	10.03		A2.9	TRBV20-1*03/*04/*05/*06/*07	TRBJ2-3*01	TRBD1*01	CSARDAGASTDTQYF	t	gcc		tgcagtgctagagatgccggggctagcacagatacgcagtatttt	13	4.4
A2.9	TRAV10*01	TRAJ15*01	CVVSA#NQAGTALIF			# frame shift mutation in CDR3				2x TRA	-	-	-	-		-	-	-	-	-
A2.10	TRAV27*01	TRAJ53*01	CAGEGSNYKLTF		ag	tgtgcaggagagggtagcaactataaactgacattt	10	6.44		A2.10	TRBV5-1*01	TRBJ2-1*01	/	CASSLEDPQYNEQFF		aagatccccaa		tgcgccagcagcttggaagatccccaatacaatgagcagttcttc	13	13
A2.11	TRAV38-1*03	TRAJ54*01	CAFMGAGAQKLVF		ggcgc	tgtgctttcatgggcgcgggagcccagaagctggtattt	11	9.25		A2.11	TRBV4-3*01	TRBJ2-3*01	TRBD2*01	CASSQILRGGPPDTQYF
A2.13	TRAV26-1*01	TRAJ39*01	CIVSHNAGNMLTF		tc	tgcatcgtcagtcataatgcaggcaacatgctcaccttt	11			A2.13	TRBV5-1*01	TRBJ2-5*01	TRBD2*01	CASSLERETQYF					10
A2.14	TRAV26-1*01/*02	TRAJ24*02	CIVRVIGSWGKLQF		atcgg	tgcatcgtcagagtcatcggcagctgggggaaattgcagttt	12	11.01		A2.14	TRBV6-1*01	TRBJ1-1*01	TRBD1*01	CASIVTGGNTEAFF		ttgt		tgtgccagcattgtgacaggggggaacactgaagctttcttt	12	13
A3.4	TRAV8-2*01	TRAJ37*01/*02	CVVSDLVRNTGKLIF	tc	ttgtgc	tgtgttgtgagtgatcttgtgcgcaacacaggcaaactaatcttt	13	9.25		A3.4	TRBV7-9*03	TRBJ2-4*01	TRBD1*01	CASSRVGAAKNIQYF		cgcgtt		tgtgccagcagccgcgttggggcagccaaaaacattcagtacttc	13	10.02
A3.5	TRAV23/D6*01	TRAJ47*01	CAASGVGGNKLVF		tggggttgg	tgtgcagcaagtggggttggtggaaacaaactggtcttt	11	9.25		A3.5	TRBV20-1*01	TRBJ2_1*01	/	CSASGNEQFF					8	13
A3.6	TRAV9-2*02	TRAJ56*01	CALIGANSKLTF		t	tgtgctctgattggagccaatagtaagctgacattt	10	9.25		A3.6	TRBV20-1*01	TRBJ2-7*01	TRBD1*01	CSATQGQGNSYEQYF		ccca	aaa	cccagggacagggaaactcctacgagcagtacttc	13	13
A3.10	TRAV38-1*03	TRAJ54*01	CAFFGQGAQKLVF		tttggc	tgtgctttctttggccagggagcccagaagctggtattt	11	9.25		A3.10	TRBV5-1*01	TRBJ2-3*01	TRBD2*01	CASSLSASGGATDTQYF		tccg	ct	tgcgccagcagcttgtccgctagcgggggggctacagatacgcagtatttt	15	13
A3.10	TRAV8-6*02	no rearrangement	-	-	-	-				2x TRA	-	-	-	-		-	-	-	-	-
A3.11	TRAV22*01	TRAJ18*01	CAVERDRGSTLGRLYF	g		tgtgctgtggagcgcgacagaggctcaaccctggggaggctatacttt	14	9.24		A3.11	TRBV20-1*01	TRBJ1-4*01	TRBD2*02	CSARDGRGLGELFF	t		gccttggag	tgcagtgctagagatgggaggggccttggagaactgtttttt	12	13
A3.12	TRAV20*02	TRAJ11*01	CAVRGYSTLTF		agg	tgtgctgtgaggggatacagcaccctcaccttt	9	9.25		A3.12	TRBV9*01	TRBJ2-1*01	TRBD1*01	CASSAAQDTNEQFF		cagcacaa	c	tgtgccagcagcgccagcacaagacaccaatgagcagttcttc	12	4.4
A3.12	TRAV12-1*01	TRAJ15*01	CVVDGNQAGTALIF		gacggt	tgtgtggtggacggtaaccaggcaggaactgctctgatcttt	12	13		2x TRA	-	-	-	-		-	-	-	-	-
A3.14	TRAV20*02	TRAJ7*01	CAVQAGGNNRLAF	cc	gga	tgtgctgtgcaggccggagggaacaacagactcgctttt	11	10.25		A3.14	TRBV5-1*01	TRBJ1-2*01	TRBD1*01	CASSLERDGYTF	_	aaa	_	tgcgccagcagcttggaaagggacggctacaccttc	10	6.44
A3.15	TRAV19*01	TRAJ49*01	CALSRAGTGNQFYF		ccgggcagg	tgtgctctgagccgggcaggcaccggtaaccagttctatttt	12	9.25		A3.15	TRBV5-1*01	TRBJ2-4*01	TRBD2*01	CASSLGLRGENIQYF		gctt		tgcgccagcagcttgggcttgcggggggaaaacattcagtacttc	13	4.4
A4.5	TRAV13-1*01	TRAJ42*01	CAALGGSQGNLIF		tctc	tgtgcagctctcggaggaagccaaggaaatctcatcttt	11	13		A4.5	TRBV15*02	TRBJ2-1*01	TRBD1*01	CATSRGQSLVYNEQFF			tctctggt	tgtgccaccagcaggggacagtctctggtctacaatgagcagttcttc	14	13
A4.6	TRAV20*02	TRAJ7*01	CAVQAGGNNRLAF	cc	gga	tgtgctgtgcaggccggagggaacaacagactcgctttt	11	10.25		A4.6	TRBV5-1*01	TRBJ1-2*01	TRBD1*01	CASSLERDGYTF	_	aaa	_	tgcgccagcagcttggaaagggacggctacaccttc	10	4.4
A4.7	TRAV36/DV7*04	TRAJ53*01	CATRRGSNYKLTF		acccggagg	tgtgctacccggaggggtagcaactataaactgacattt	11	11		A4.7	TRBV20-1*01	TRBJ2-3*01	TRBD2*01	CSAPLSGGSTDTQYF		ccccctg	a	tgcagtgcccccctgagcgggggaagcacagatacgcagtatttt	13	13
A4.10	TRAV8-6*01	TRAJ34*01	CAVSDPYTDKLIF	tc	ctt	tgtgctgtgagtgatccttacaccgacaagctcatcttt	11	4.4		A4.10	TRBV12-3*01	TRBJ2-7*01	TRBD1*01	CAVSDPYTDKLIF	tc	ctt	_	tgtgctgtgagtgatccttacaccgacaagctcatcttt	11	5.45
A4.11	TRAV38-1*01/*04	TRAJ52*01	CASGGTSYGKLTF			tgtgcttctggtggtactagctatggaaagctgacattt	11	9.07		A4.11	TRBV27*01	TRBJ1-2*01	TRBD1*01	CASSAISQPPTGMSGYTF		gccatatcccaacccccc	atgag	tgtgccagcagtgccatatcccaaccccccacagggatgagtggctacaccttc	16	13
A4.12	TRAV12-2*01	TRAJ11*01	CAVRNSGYSTLTF		tcg	tgtgccgttcggaattcaggatacagcaccctcaccttt	11	9.25		A4.12	TRBV29-1*01/*03	TRBJ1-5*01	TRBD2*02	CSVVDGSNQPQHF		taga	t	tgcagcgttgtagacgggagtaatcagccccagcatttt	11	4.4
A4.13	TRAV6*03	TRAJ36*01	CALKYGANNLFF		aaatac	tgtgctctaaaatacggggcaaacaacctcttcttt	10	9.07		A4.13	TRBV18*01	TRBJ1-1*01	TRBD1*01	CASSPTTGGDEAFF		ac	tgs	tgtgccagctcaccaacgacagggggtgatgaagctttcttt	13	10.25
A4.14	TRAV41*01	TRAJ34*01	CAVLESGDKLIF		ttggagtcggg	tgtgctgtcttggagtcgggcgacaagctcatcttt	10	4.4		A4.14	TRBV6-1*01	TRBJ1-2*01	TRBD2*01	CASSEAFRDYGYTF		ggcagtga	tttcggg	tgtgccggcagtgaagcgtttcgggactatggctacaccttc	12	5.45
A4.16	TRAV9-2*02	TRAJ3*01	CALSDQDSSASKIIF	tca	gg	tgtgctctgagtgatcaggacagcagtgcttccaagataatcttt	13	4.4		A4.16	TRBV2*01	TRBJ1-6*02	TRBD1*01	CASRTGGSGNSPLHF		a	tagtgg	tgtgccagcagaacagggggtagtggtaattcacccctccacttt	13	6.59
A5.1	TRAV13-1*01	TRAJ11*01	CATHSGYSTLTF		actc	tgtgcaactcattcaggatacagcaccctcaccttt	10	7.49		A5.1	TRBV30*01	TRBJ1-6*02	TRBD1*01	CAWSVEGAQNSPLHF		cg	gcag	tgtgcctggagtgtcgagggggcgcagaattcacccctccacttt	13	6.44
A5.1	TRAV5*01	TRAJ15*01	CAETPNQAGTALIF		ccc	tgtgcagagacccccaaccaggcaggaactgctctgatcttt	12	13		2x TRA	-	-	-	-		-	-	-	-	-
A5.3	TRAV8-6*02	TRAJ4*01	CAVNPGGYNKLIF		acc	tgtgctgtgaaccctggtggctacaataagctgattttt	11	9.07		A5.3	TRBV4-1*01	TRBJ2-5*01	TRBD2*02	CASSQDSRRETQYF	t	agca		tgcgccagcagccaagatagcaggagggagacccagtacttc	12	6.44
A5.4	TRAV24*01	TRAJ22*01	CASLSGCARQLTF		ccctttctggttg	tgtgcctccctttctggttgtgcaaggcaactgaccttt	11	8.5		A5.4	TRBV25-1*01	TRBJ1-2*01	TRBD1*01	CASRGDSLLGGYTF		ggga	tcttctgggc	tgtgccagcaggggagacagtcttctgggcggctacaccttc	12	5.45
A5.5	TRAV26-1*01/*02	TRAJ54*01	CIVRVEIQGAQKLVF		a	atcgtcagagtcgaaattcagggagcccagaagctggta	13	9.2		A5.5	TRBV5-1*01	TRBJ2-5*01	TRBD1*01	CASSLGPGQRETQYF		gtcc	agag	tgcgccagcagcttgggtccggggcagagagagacccagtacttc	13	13
A5.6	TRAV34*01	TRAJ3*01	CGADW#SSASKIIF			# frame shift mutation in CDR3				A5.6	TRBV27*01	TRBJ1-6*02	TRBD2*01	CASGTGDSPLHF		ggta	ac	tgtgccagcggtacgggggactcacccctccacttt	10	5.45
A5.7	TRAV26-1*01/*02	TRAJ42*01	CIVRVVHYGGSQGNLIF		ttc	tgcatcgtcagagtcgttcattatggaggaagccaaggaaatctcatcttt	15	9.25		A5.7	TRBV29-1*01/*03	TRBJ1-1*01	TRBD1*01	CSVEGVGWSAFF			ttgggtggtcg	tgcagcgttgagggggttgggtggtcggctttcttt	10	5.45
A5.7	TRAV12-3*01	TRAJ45*01	CAMSSGGGADGLTF			tgtgcaatgagctcaggaggaggtgctgacggactcaccttt	12	13		2x TRA	-	-	-	-		-	-	-	-	-
A5.8	TRAV26-1*02	TRAJ21*01	CIAIYNFNKFYF	ta	cca	tgcatcgccatatacaacttcaacaaattttacttt	10	8.21		A5.8	TRBV5-1*01	TRBJ1-6*02	TRBD2*01	CASSLEASSYNSPLHF	ag	a		tgcgccagcagcttggaagcgagctcctataattcacccctccacttt	14	13
A5.9	TRAV26-1*01/*02	TRAJ21*01	CIAIYNFNKFYF	ta	cca	tgcatcgccatatacaacttcaacaaattttacttt	10	8.21		A5.9	TRBV5-1*01	TRBJ1-6*02	TRBD2*01	CASSLEASSYNSPLHF	ag	a		tgcgccagcagcttggaagcgagctcctataattcacccctccacttt	14	7.5
A6.1	TRAV41*01	TRAJ47*02	CAVRVTGNKLVF		cgagtgac	gctgtccgagtgactggaaacaagctggtc	10	11		A6.1	TRBV5-4*01	TRBJ2-3*01	TRBD2*01	CASSLGLAGSTDTQYF				tgtgccagcagcttgggactagcggggagcacagatacgcagtatttt	14	5.45
A6.2	TRAV1-2*01	TRAJ22*01	CAVRVR#F			# frame shift mutation in CDR3				A6.2	TRBV12-3*01	TRBJ1-5*01	TRBD1*01	CASSLSQQGGQPQHF		agtcag	g	tgtgccagcagtttaagtcagcaggggggtcagccccagcatttt	13	9.25
A6.4	TRAV27*01	TRAJ40*01	CAGPHSGTYKYIF		cccca	gcaggaccccactcaggaacctacaaatacatc	11	8.97		A6.4	TRBV16*01/*02*03	TRBJ2-7*01	TRBD1*01	CASSQLNSYHEQYF		tga	ttacc	tgtgccagcagccaattgaacagttaccacgagcagtacttc	12	13
A6.5	TRAV27*01	TRAJ36*01	CAGPSQTGANNLFF		ccctagc	tgtgcaggccctagccaaactggggcaaacaacctcttcttt	12	13		A6.5	TRBV5-1*01	TRBJ1-4*01	TRBD2*02	CASSLVHGRNEKLFF		ttcat		tgcgccagcagcttggttcatgggaggaatgaaaaactgtttttt	13	6.45
A6.6	TRAV8-4*01/*04	TRAJ23*01	CAVSEAYNQGGKLIF		ggc	tgtgctgtgagtgaggcttataaccagggaggaaagcttatcttc	13	6.44		A6.6	TRBV5-1*01	TRBJ2-2*01	TRBD1*01	CASSYTGPAGELFF		ac	ccag	tgcgccagcagctacacagggccagccggggagctgtttttt	12	4.4
A6.7	TRAV8-4*01/*04	TRAJ23*01	CAVSEAYNQGGKLIF		ggc	tgtgctgtgagtgaggcttataaccagggaggaaagcttatcttc	13	6.44		A6.7	TRBV7-9*01	TRBJ1-1*01	TRBD1*01	CASRSGQVNTEAFF		atcc	tt	tgtgccagcagatccggacaggttaacactgaagctttcttt	12	7.5
A6.11	TRAV17*01	TRAJ18*01	CATDDKDRGSTLGRLYF		acaag	tgtgctacggacgacaaggacagaggctcaaccctggggaggctatacttt	15	6.68		A6.11	TRBV5-1*01/*02	TRBJ2-3*01	TRBD1*01	CASSADRVTDTQYF		gc	tt	tgcgccagcagcgcggacagggttacagatacgcagtatttt	12	5.45
A6.12	TRAV8-6*02	TRAJ40*01	CAVVTSGTYKYIF		gt	tgtgctgtggttacctcaggaacctacaaatacatcttt	11	8.97		A6.12	TRBV5-5*01	TRBJ1-6*02	TRBD1*01	CASSFPGALNSPLHF		tc	cgctc	tgtgccagcagctttccaggggcgctcaattcacccctccacttt	13	7.17
A6.15	TRAV26-1*01/*02	TRAJ21*01	CIAIYNFNKFYF	ta	cca	tgcatcgccatatacaacttcaacaaattttacttt	10	8.97		A6.15	TRBV5-1*01	TRBJ1-6*02	TRBD2*01	CASSLEASSYNSPLHF	ag	a		tgcgccagcagcttggaagcgagctcctataattcacccctccacttt	14	5.45
	7 clones express two TRA genes
